# Supplementary material
Source: PubMed Central journal article supplement (PMC514645)
Supplement: cmaj_171_5_475__1.pdf [file cmaj_171_5_475__1.pdf]

**e-Table: Declaration of editor's conflicts of interest by general and internal medicine journals**

| Journal*                                             | Impact factor | Have a policy on editors' conflicts of interest | Importance of reporting editors' financial interests |                          |                          | Do not intend to declare interests |                                    |
|------------------------------------------------------|---------------|-------------------------------------------------|------------------------------------------------------|--------------------------|--------------------------|------------------------------------|------------------------------------|
|                                                      |               |                                                 | Very important                                       | Important                | Not important            | Editors                            | Editorial board members / advisers |
| New England Journal of Medicine†                     | 29.065        | <input type="checkbox"/>                        |                                                      |                          |                          |                                    |                                    |
| The Journal of the American Medical Association†     | 17.569        | <input type="checkbox"/>                        | <input type="checkbox"/>                             |                          |                          |                                    |                                    |
| The Lancet‡                                          | 13.251        | <input type="checkbox"/>                        | <input type="checkbox"/>                             |                          |                          |                                    |                                    |
| Annals of Internal Medicine†                         | 11.130        | <input type="checkbox"/>                        | <input type="checkbox"/>                             |                          |                          |                                    | <input type="checkbox"/>           |
| Annual Review of Medicine†                           | 8.545         |                                                 |                                                      |                          |                          | <input type="checkbox"/>           | <input type="checkbox"/>           |
| Archives of Internal Medicine†                       | 6.661         |                                                 |                                                      | <input type="checkbox"/> |                          |                                    | <input type="checkbox"/>           |
| British Medical Journal‡                             | 6.629         | <input type="checkbox"/>                        | <input type="checkbox"/>                             |                          |                          |                                    |                                    |
| Journal of Internal Medicine‡                        | 2.898         |                                                 |                                                      | <input type="checkbox"/> |                          |                                    |                                    |
| Annals of Medicine‡                                  | 2.818         |                                                 |                                                      |                          | <input type="checkbox"/> | <input type="checkbox"/>           | <input type="checkbox"/>           |
| Canadian Medical Association Journal‡                | 2.808         | <input type="checkbox"/>                        | <input type="checkbox"/>                             |                          |                          |                                    | <input type="checkbox"/>           |
| Mayo Clinic Proceedings                              | 2.644         | <input type="checkbox"/>                        |                                                      |                          | <input type="checkbox"/> | <input type="checkbox"/>           | <input type="checkbox"/>           |
| QJM: An International Journal of Medicine            | 2.601         |                                                 |                                                      | <input type="checkbox"/> |                          | <input type="checkbox"/>           | <input type="checkbox"/>           |
| Journal of General Internal Medicine                 | 2.404         |                                                 |                                                      | <input type="checkbox"/> |                          | <input type="checkbox"/>           | <input type="checkbox"/>           |
| The British Journal of General Practice              | 1.418         | <input type="checkbox"/>                        | <input type="checkbox"/>                             |                          |                          |                                    |                                    |
| Medicina Clínica                                     | 0.837         |                                                 |                                                      | <input type="checkbox"/> |                          | <input type="checkbox"/>           | <input type="checkbox"/>           |
| The New Zealand Medical Journal                      | 0.828         |                                                 |                                                      | <input type="checkbox"/> |                          |                                    |                                    |
| Journal of the Royal College of Physicians of London | 0.827         |                                                 | <input type="checkbox"/>                             |                          |                          | <input type="checkbox"/>           | <input type="checkbox"/>           |
| International Journal of Clinical Practice           | 0.727         | <input type="checkbox"/>                        | <input type="checkbox"/>                             |                          |                          |                                    |                                    |
| Journal of the Royal Society of Medicine             | 0.719         |                                                 | <input type="checkbox"/>                             |                          |                          |                                    | <input type="checkbox"/>           |
| Aviation, Space, and Environmental Medicine          | 0.690         |                                                 | <input type="checkbox"/>                             |                          |                          | <input type="checkbox"/>           | <input type="checkbox"/>           |
| Wiener Klinische Wochenschrift                       | 0.646         |                                                 | <input type="checkbox"/>                             |                          |                          |                                    |                                    |
| Postgraduate Medicine                                | 0.636         |                                                 |                                                      |                          |                          |                                    |                                    |
| Annales de Médecine Interne                          | 0.569         |                                                 |                                                      | <input type="checkbox"/> |                          |                                    |                                    |
| Yonsei Medical Journal                               | 0.382         |                                                 |                                                      |                          | <input type="checkbox"/> | <input type="checkbox"/>           | <input type="checkbox"/>           |
| Medicina (Buenos Aires)                              | 0.370         |                                                 |                                                      | <input type="checkbox"/> |                          |                                    |                                    |
| Acta Clinica Belgica                                 | 0.361         |                                                 |                                                      |                          | <input type="checkbox"/> | <input type="checkbox"/>           | <input type="checkbox"/>           |
| Revista de Investigación Clínica                     | 0.303         |                                                 |                                                      |                          | <input type="checkbox"/> | <input type="checkbox"/>           | <input type="checkbox"/>           |
| Hospital Medicine                                    | 0.299         |                                                 |                                                      |                          | <input type="checkbox"/> |                                    | <input type="checkbox"/>           |
| Schweizerische Medizinische Wochenschrift            | 0.253         |                                                 |                                                      |                          | <input type="checkbox"/> |                                    |                                    |
| East African Medical Journal                         | 0.221         |                                                 |                                                      |                          |                          |                                    |                                    |

---

\*Ten journals were excluded: 3 before the questionnaire was mailed because there was insufficient contact details (Advances in Internal Medicine, Ethiopian Medical Journal) or the journal had ceased publication (Proceedings of the Association of American Physicians) and 7 after the mailing because the editor did not respond (Journal of Investigative Medicine [impact factor 2.527], Primary Care [0.738], Journal of Women's Health & Gender-based Medicine [0.685], The American Journal of Chinese Medicine [0.511], Revue de médecine interne [0.393], Panminerva Medica [0.268], Annals of Saudi Arabian Medicine [0.088]).

†Top 5 US journals.

‡Top 5 non-US journals.
